# Supplementary material for: Targeted Genome Replacement via Homology-directed Repair in Non-dividing Cardiomyocytes
Source: PubMed Central journal article supplement (PMC5571012; doi:10.1038/s41598-017-09716-x), 2017-08-24
Supplement: 41598_2017_9716_MOESM1_ESM.pdf [file 41598_2017_9716_MOESM1_ESM.pdf]

1 **Supplemental Information**

2

3 **Title**

4 **Targeted Genome Replacement via Homology-directed Repair in Non-dividing**  
5 **Cardiomyocytes**

6

7 **Authors/Affiliations**

8 Takamaru Ishizu<sup>1</sup>, Shuichiro Higo<sup>1</sup>, Yuki Masumura<sup>1</sup>, Yasuaki Kohama<sup>1</sup>, Mikio Shiba<sup>1</sup>, Tomoaki Higo<sup>1</sup>, Masato  
9 Shibamoto<sup>1</sup>, Akito Nakagawa<sup>1</sup>, Sachio Morimoto<sup>2</sup>, Seiji Takashima<sup>3</sup>, Shungo Hikoso<sup>1,4</sup> and Yasushi Sakata<sup>1</sup>

10 <sup>1</sup> Department of Cardiovascular Medicine, Osaka University Graduate School of Medicine, Suita, Osaka 565-0871,  
11 Japan

12 <sup>2</sup> Department of Health and Medical Care, International University of Health and Welfare, Okawa, Fukuoka 831-  
13 8501, Japan

14 <sup>3</sup> Department of Medical Biochemistry, Osaka University Graduate School of Medicine, Suita, Osaka 565-0871,  
15 Japan

16 <sup>4</sup> Department of Medical Therapeutics for Heart Failure, Osaka University Graduate School of Medicine, Suita,  
17 Osaka 565-0871, Japan

18

1 **Supplemental Methods**

2

3 **Reagents and antibodies**

4 Antibodies used in this study: Cardiac Troponin I (Abcam Cat# ab47003 RRID:AB\_869982), Gapdh (Millipore Cat#  
5 MAB374 RRID:AB\_2107445),  $\alpha$ -SMA (Sigma-Aldrich Cat# A2547 RRID:AB\_476701), Vimentin (Abcam Cat#  
6 ab24525 RRID:AB\_778824), RFP-HRP (clone 1G9, MBL), FLAG M2 antibody (Sigma-Aldrich Cat# F1804,  
7 RRID:AB\_262044),  $\alpha$ -actinin (Abcam Cat# ab9465, RRID:AB\_307264),  $\beta$ -actin (Actb) (Cell Signaling Technology  
8 Cat# 4967, RRID:AB\_330288), Myl2 (Proteintech Group Cat# 10906-1-AP RRID:AB\_2147453). Alexa 488-, 568-  
9 and 647-conjugated secondary antibodies (Invitrogen).

10

11 **Single strand annealing assays**

12 Targeted genomic sequences were cloned into pCAG-EGxxFP vector <sup>1</sup> encoding tandem truncated EGFP gene with  
13 overlapped sequence separated by the cloning site. pCAG-EGxxFP vector with or without pX459 vector <sup>2</sup> encoding  
14 SpCas9 and the indicated sgRNAs were transfected into 293T cells pre-seeded in Greiner CELLSTAR 96 well plate  
15 ( $1 \times 10^4$  cells/well). Forty-eight hours after transfection, the fluorescent images of EGFP were obtained by image  
16 cytometry, and quantitatively analyzed using IN Cell Developer Toolbox (GE). A total of 36 nonoverlap images (9  
17 images per well) were obtained from each sample in one experiment using a 10 $\times$ /0.45NA Nikon lens.

18

19 **Cel-I assay**

20 C2C12 cells were seeded in 12 well plate ( $2 \times 10^4$  cells/well) one day before transfection. pX459 vector was  
21 transfected into C2C12 cells using Lipofectamine 3000 (Life Technologies). Two days after transfection, medium  
22 was exchanged to the medium containing 3  $\mu$ g/mL puromycin to select the cells expressing Cas9. After puromycin  
23 selection, genomic DNA were extracted using QIAamp DNA Mini Kit (QIAGEN). Neonatal mouse cardiomyocytes  
24 isolated from Cas9 knock-in mice were seeded in 24 well plate ( $5 \times 10^5$  cells/well) one day before transfection. Five  
25 hundred ng of *Tnnt2* sgRNA#1 or #2 was transfected into neonatal mouse cardiomyocytes using Lipofectamine

1 MessengerMAX (Life Technologies). Two days after transfection, genomic DNA were extracted. Target regions  
2 were amplified by PCR (KOD Fx Neo, TOYOBO) as follows: 94 °C for 2 min, followed by 30 cycles of 98 °C for  
3 10 s, annealing temperature (depending on primer sequences) for 30 s and 68 °C for 30 s. Primer sequences are listed  
4 in Supplementary Table. After purification of PCR products using QIAquick PCR purification kit (QIAGEN), PCR  
5 fragments both from untreated and treated allele were hybridized to form hetero DNA duplex. Then, hybridized PCR  
6 hetero duplexes were enzymatically digested by mismatch-specific endonuclease, Cel-I 42 °C for 60 min  
7 (SURVEYOR Mutation Detection Kit).

8

### 9 **Genotyping**

10 Genomic DNA were extracted from mouse tail using a ready-made extraction solution (Express Extract, KAPA  
11 Biosystems). PCR reactions were performed using 5 µl ReadyMix (HiFi HotStart ReadyMix, KAPA Biosystems),  
12 0.5 µl of 10 µM forward and reverse primers, 0.4 µl of DNA extract and PCR-grade water to a total amount of 10 µl.  
13 For Cas9 KI mice, 10 µM forward and two reverse primers were mixed. PCR conditions are as follows: 95 °C for 3  
14 min, followed by 33 cycles of 95 °C for 10 s, 60 °C for 10 s and 72 °C for 10s. Amplified DNA was separated by  
15 electrophoresis in a 2 % TBE agarose gel.

16

### 17 **Western Blotting**

18 For western blotting, cells were washed with cold PBS and directly lysed with SDS buffer (50mM Tris-HCl  
19 (pH7.4), 5mM EDTA). The protein concentration was determined when required by BCA Protein Assay Kit  
20 (Thermo). Lysate samples were mixed with 4 × Laemmli sample buffer (BioRad) with mercaptoethanol (2.5%).  
21 Proteins were separated by SDS-PAGE and transferred to PVDF membrane. Antibodies were diluted by 3% nonfat  
22 milk. After blocking with 3% nonfat milk for 1 h, the transferred membrane was incubated with primary antibody  
23 at 4°C overnight and with secondary antibody at room temperature for 30 min. The membrane signals were  
24 detected by chemiluminescence using ECL or ECL prime reagent (GE). Gapdh was used as control for equal  
25 loading and transfer. The protein expression level was quantified using ImageQuant TL (GE). Theoretical

1 molecular weight of the protein was calculated using website tool (ExPASy: [http://web.expasy.org/compute\\_pi/](http://web.expasy.org/compute_pi/)).  
2 The number of moles of each protein band were estimated by normalizing protein expression levels by molecular  
3 weight and relative molar ratio of tdTomato-tagged protein was calculated.

4

#### 5 **Generation of sgRNA, Cas9 mRNA and transfection**

6 sgRNAs were generated by MEGAshortscript T7 Transcription Kit (Life Technologies) using custom-made double  
7 strand oligo DNA nucleotide (GeneArt CRISPR T7 strings DNA, Life Technologies) as a template. sgRNA targeting  
8 LacZ was used as a control<sup>3</sup>. The Cas9 mRNA was transcribed using FLAG-tagged Cas9 expression vector and the  
9 mMESAGE mMACHINE T7 ULTRA kit (Life Technologies). After in vitro transcription, DNase I treatment and  
10 poly (A) tailing reaction were performed. The generated RNAs were then purified using MEGA clear kit (Life  
11 Technologies). Purified sgRNAs or mRNA was transfected into neonatal cardiomyocytes using Lipofectamine  
12 messenger MAX (Life Technologies).

13

#### 14 **Langendorff-perfusion of adult mouse heart**

15 The adult hearts were quickly excised and mounted onto a Langendorff perfusion apparatus as previously reported  
16 <sup>4</sup>. The hearts were perfused with calcium-free buffer (0-Ca<sup>2+</sup> buffer: 126 mM NaCl, 8.8 mM KCl, 2.0 mM MgCl<sub>2</sub>,  
17 24 mM HEPES, 5.0 mM sodium pyruvate, 11 mM D-glucose, 1 × Glutamax, 30 mM 2,3-Butanedione monoxime,  
18 4.4 mM creatine monohydrate, 8.0 mM Taurine, pH 7.4) for 5 min at 2 ml/min, then with collagenase solution  
19 (1 mg/ml type 2 collagenase, 0.2 mg/ml protease type 14, 50 μM CaCl<sub>2</sub> in 0-Ca<sup>2+</sup> buffer) for 10 min at 3 ml/min.  
20 The whole system was maintained at 39 °C. Following perfusion, hearts were placed in a 60-mm dish containing  
21 50 μM Ca<sup>2+</sup> buffer (50 μM CaCl<sub>2</sub> in 0-Ca<sup>2+</sup> buffer) and minced with micro-scissors into small pieces. Non-  
22 cardiomyocytes were quickly removed according to their size (smaller than cardiomyocytes) using cell strainer.  
23 Isolated cardiomyocytes were incubated for 7 days after AAV6 transduction.

24

#### 25 **Statistical Analysis**

1 Data are expressed as means  $\pm$  S.D. of at least three independent experiments, unless otherwise indicated. The two-  
2 tailed Student's *t*-test or one-way ANOVA with repeated measures followed by Post-hoc Tukey test were used to  
3 analyze differences between two groups. *p*-value < 0.05 was considered statistically significant.

4

#### 5 **Supplemental Reference**

- 6 1 Mashiko, D. *et al.* Generation of mutant mice by pronuclear injection of circular  
7 plasmid expressing Cas9 and single guided RNA. *Sci Rep* **3**, 3355,  
8 doi:10.1038/srep03355 (2013).
- 9 2 Ran, F. A. *et al.* Genome engineering using the CRISPR-Cas9 system. *Nat Protoc*  
10 **8**, 2281-2308, doi:10.1038/nprot.2013.143 (2013).
- 11 3 Platt, R. J. *et al.* CRISPR-Cas9 knockin mice for genome editing and cancer  
12 modeling. *Cell* **159**, 440-455, doi:10.1016/j.cell.2014.09.014 (2014).
- 13 4 Higo, T. *et al.* DNA single-strand break-induced DNA damage response causes  
14 heart failure. *Nat Commun* **8**, 15104, doi:10.1038/ncomms15104 (2017).
- 15 5 Du, C. K. *et al.* Knock-in mouse model of dilated cardiomyopathy caused by  
16 troponin mutation. *Circ Res* **101**, 185-194, doi:10.1161/CIRCRESAHA.106.146670  
17 (2007).

18

19

## 1 Supplemental Figure Legends

### 2 Figure S1

- 3 A) Cleavage activity of each sgRNA targeting exon 6 of mouse *Actb* was evaluated by single-strand annealing  
4 assay (see Methods) (n=3, means  $\pm$  SD).
- 5 B) C2C12 cells were transfected with pX459 vector encoding sgRNA against exon 6 of mouse *Actb*. Two days  
6 after transfection, cells were exposed to 3  $\mu$ g/mL puromycin for two days. Genomic DNA was extracted, and  
7 cleavage activities were evaluated by Cel-I assay. White arrowhead indicates the cleaved PCR products.
- 8 C) The nucleotide sequence and its translated amino acid sequence at the 3'-terminal region of *Actb*. The expected  
9 sequences after HDR are shown below.
- 10 D) Isolated cardiac fibroblasts were immunostained with anti- $\alpha$ -smooth muscle actin ( $\alpha$ -SMA) or anti-vimentin  
11 antibodies. Nuclei were stained with Hoechst. Scale bar: 100  $\mu$ m.
- 12 E) PCR products shown in Fig. 1F were cloned and sequenced. Electropherograms of recombination sites are  
13 shown.
- 14 F) Cardiac fibroblasts isolated from Cas9 knock-in mice were transduced with AAV2 encoding sgRNA and HDR  
15 template ( $3.02 \times 10^4$  viral genomes/cell). Forty-eight hours after transduction, whole-cell lysates were prepared  
16 and analyzed by western blot using anti-Actb and anti-RFP antibodies. White and black arrowheads indicate the  
17 Actb-tdTomato fusion protein and endogenous Actb, respectively. The estimated molar ratio of Actb-tdTomato  
18 fusion protein and endogenous Actb is shown (n=3, means  $\pm$  SD). GAPDH was used as a loading control.
- 19 G) Cardiac fibroblasts isolated from Cas9 knock-in mice were seeded in 96-well plates and transduced with AAV2  
20 encoding sgRNA and HDR template ( $9.1 \times 10^3$  viral genomes/cell). Two, 4 and 6 days after transduction, cells  
21 were fixed and stained with anti-Vimentin and anti- $\alpha$ -SMA antibody. The proportion of tdTomato-positive  
22 fibroblasts (among Vimentin-positive cells) was calculated using the image cytometry (n=3, means  $\pm$  SD, \*:  
23  $p < 0.05$  vs day 2)
- 24 H) Cardiac fibroblasts isolated from Cas9 knock-in mice were treated as in (G). Six days after transduction, cells  
25 were passaged and incubated until day 12, then fixed and stained as in (G). Representative fluorescent images

1 at day 6 and day 12 are shown. Scale bar: 50  $\mu$ m.

2

3 Figure S2

4 A) Four candidate sgRNAs were designed to cleave near the stop codon in exon 7 of the mouse *MyI2* gene.

5 B) Cleaving activity of each sgRNA targeting exon 7 of *MyI2* was evaluated by single-strand annealing assay (left,  
6 n=3, means  $\pm$  SD). C2C12 cells were transfected with pX459 vector encoding sgRNA against *MyI2* (#2). Two  
7 days after transfection, cells were exposed to 3  $\mu$ g/mL puromycin for 2 days. Genomic DNA was extracted, and  
8 cleavage activities were evaluated by Cel-I assay (right).

9 C) The nucleotide sequence and its translated amino acid sequence at the 3'-terminal region of *MyI2*. The expected  
10 sequences after HDR are shown below.

11 D) Cardiac cells isolated from neonatal hearts were transduced with AAV6 encoding LacZ at increasing viral titer  
12 ( $1.93 \times 10^5$ ,  $4.83 \times 10^5$ ,  $9.66 \times 10^5$  viral genomes/cell). Two days after transduction, cells were fixed and  
13 immunostained with anti-LacZ and anti-Troponin I antibodies. The proportions of LacZ-positive cells among  
14 Troponin I-positive cardiomyocytes and Troponin I-negative non-cardiomyocytes were evaluated using the  
15 image cytometry (n=3, means  $\pm$  SD).

16 E) Cardiomyocytes isolated from Cas9 knock-in mice were seeded in 96-well plates and transduced with AAV  
17 serotype 6 (AAV6) encoding sgRNA and HDR template. Four days after transduction, genomic DNA was  
18 extracted, and genomic PCR was performed using the indicated primers (shown in Fig. 2A). NTD: non-  
19 transduced control.

20 F) PCR products shown in (E) were cloned and sequenced. Electropherograms at recombination sites are shown.

21 G) Cardiomyocytes isolated from Cas9 knock-in mice were seeded in 96-well plates and transduced with AAV  
22 serotype 6 (AAV6) encoding sgRNA and HDR template. After transduction of AAV, bright-field and  
23 fluorescence images were sequentially obtained using the image cytometry targeting specified fields determined  
24 by coordinate axes. On day 4, cells were fixed and immunostained. Representative images are shown. The top  
25 panels are the time course of the edited cardiomyocytes shown in Fig. 2C. Arrowheads indicate the tdTomato-

- 1 positive cardiomyocytes. Scale bar: 100  $\mu$ m.
- 2 H) Cardiomyocytes isolated from Cas9 knock-in mice were seeded in 96-well plates and transduced with AAV6  
3 encoding sgRNA and HDR template ( $2.17 \times 10^4$  viral genomes/cell). Two, 4 and 6 days after transduction, cells  
4 were fixed and stained with anti-Troponin I antibody. The proportion of tdTomato-positive cells among  
5 Troponin I-positive cardiomyocytes was calculated using the image cytometry. (n=3, means  $\pm$  SD, \*: p<0.05 vs  
6 day 2).
- 7 I) Six days after transduction, cardiomyocytes treated as in (H) were fixed and immunostained with anti-Troponin  
8 I and anti- $\alpha$ -actinin antibody. Sarcomeric structure in tdTomato-positive cardiomyocytes in white square are  
9 enlarged in lower panels. Scale bar: 50  $\mu$ m.
- 10 J) Cardiomyocytes isolated from Cas9 knock-in mice were transduced with AAV6 encoding sgRNA and HDR  
11 template ( $2.17 \times 10^4$  viral genomes/cell). Three days after transduction, whole-cell lysates were prepared and  
12 analyzed by western blot using anti-Myl2 and anti-RFP antibodies. White and black arrowheads indicate the  
13 Myl2-tdTomato fusion protein and endogenous Myl2, respectively. The estimated molar ratio of Myl2-  
14 tdTomato fusion protein and endogenous Myl2 is shown (n=3, means  $\pm$  SD). GAPDH was used as a loading  
15 control.
- 16 K) Cardiomyocytes were isolated from adult hearts of 16-20 week old Cas9 knock-in mice using Langendorff  
17 perfusion method. Six h after isolation, AAV6 encoding sgRNA and HDR template ( $1.92 \times 10^4$  viral  
18 genomes/cell) were transduced. Six days after transduction, bright-field and fluorescent images were obtained.  
19 White arrowhead indicates a rod-shaped cardiomyocyte positive for red fluorescent signal. Scale bar: 50  $\mu$ m.

20  
21 Figure S3

- 22 A) Analytical procedures for quantitative evaluation of DNA content in cardiomyocytes and non-cardiomyocytes  
23 using IN Cell Developer Toolbox (GE). White square of segmented images and immunostained images are  
24 enlarged as lower panels. Scale bar: 200  $\mu$ m. Each italic phrase indicates the command operation defined in the  
25 software.



1        **Nucleus Recognition**

- 2        I.    Select the channel with the image of the nuclei marker (Hoechst).  
3        II.   Select *Segmentation* option (greater than 65  $\mu\text{m}^2$ ) most appropriate for an accurate nuclear segmentation.  
4        III.  Use *Postprocessing* operations (*Erosion*, *Watershed clump breaking* and *Sieve*) to refine nuclear.

5        **Cardiomyocyte Recognition**

- 6        I.    Select the channel with the image of the cardiomyocyte marker (Troponin I).  
7        II.   Select *Segmentation* option (intensity segmentation) and set an intensity threshold that identify whole cells  
8        (cell bodies).  
9        III.  Use *Postprocessing Sieve* operation (greater than 300  $\mu\text{m}^2$ ) to filter out debris, *Clump Breaking* operation  
10       using ‘Nuclei’ as ‘seed’. For quantitative evaluation, we used *Border Object Removal* to omit  
11       cardiomyocytes that extend over the edge of the image.  
12       IV.  Create a linked *One to One* target set to link ‘Nucleus’ (primary target set) with ‘Cardiomyocyte’  
13       (secondary target set), to count the number of cardiomyocytes. Set *Overlap* conditions so that more than  
14       80% of the primary target is within the secondary target.

- 15    B)   Cardiomyocytes seeded in 96-well plate were transduced with AAV6 encoding HDR components 6 h after  
16       addition of EdU, followed by continuous labeling. After 4 days of culture, cells were fixed and immunostained.  
17       Representative images of cardiomyocytes positive for tdTomato with EdU staining. Scale bar: 100  $\mu\text{m}$ .

18  
19    Figure S4

- 20    A)   C2C12 cells were transduced with pX459 vector encoding 3xFLAG-Cas9, with or without sgRNA #2 against  
21       *Tnnt2* combined with the repair template plasmid. Two days after transfection, cells were exposed to 3  $\mu\text{g}/\text{mL}$   
22       puromycin for two days. Genomic DNA was extracted, and the targeted region was amplified by PCR. Purified  
23       PCR products were digested by *XhoI*. Arrowheads indicate the cleaved PCR products.  
24    B)   Genotyping results of  $\Delta\text{K210}$  knock-in allele in neonatal mice obtained after crossing mice carrying  
25       heterozygous  $\Delta\text{K210}$  knock-in allele and homozygous Cas9 knock-in allele. The higher PCR band indicates the

- 1         $\Delta$ K210 knock-in allele <sup>5</sup>.
- 2    C) Neonatal cardiomyocytes isolated from Cas9 knock-in mice were transduced with AAV6 encoding LacZ or  
3        editing components shown in Fig. 4F ( $1.88 \times 10^5$  viral genomes/cell). Forty-eight hours after transduction,  
4        whole-cell lysates were extracted. Troponin T and Gapdh were detected by western blot.
- 5    D) Representative results of Sanger sequencing analysis (upper). The number of clones and their ratio in each heart  
6        sample (lower, 50 clones per sample (each sample was isolated from an individual neonatal heart; biological  
7        replicates=4)).

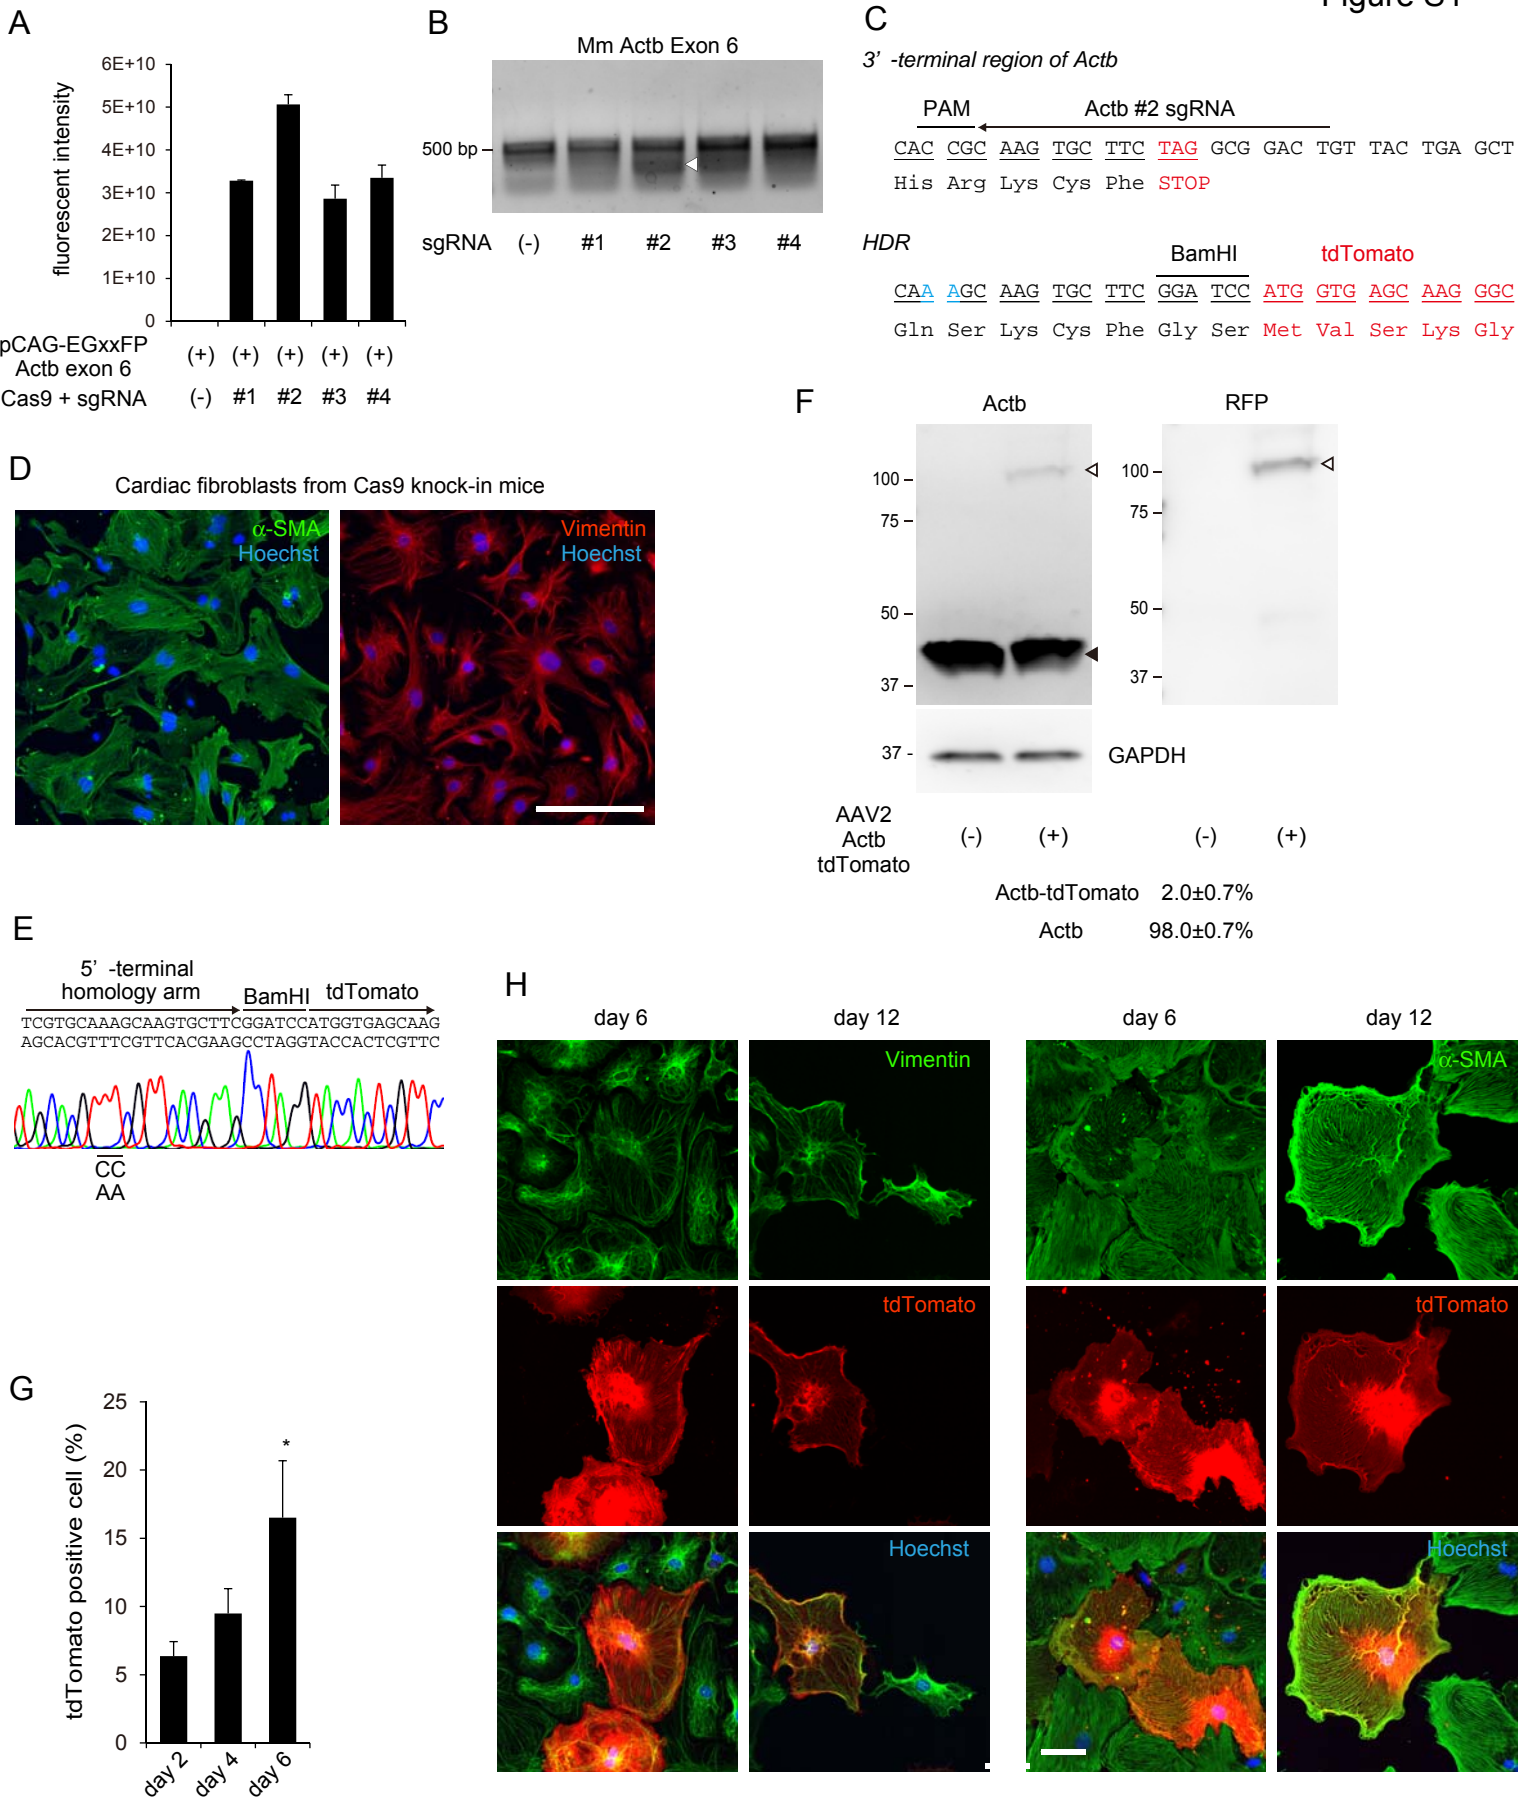

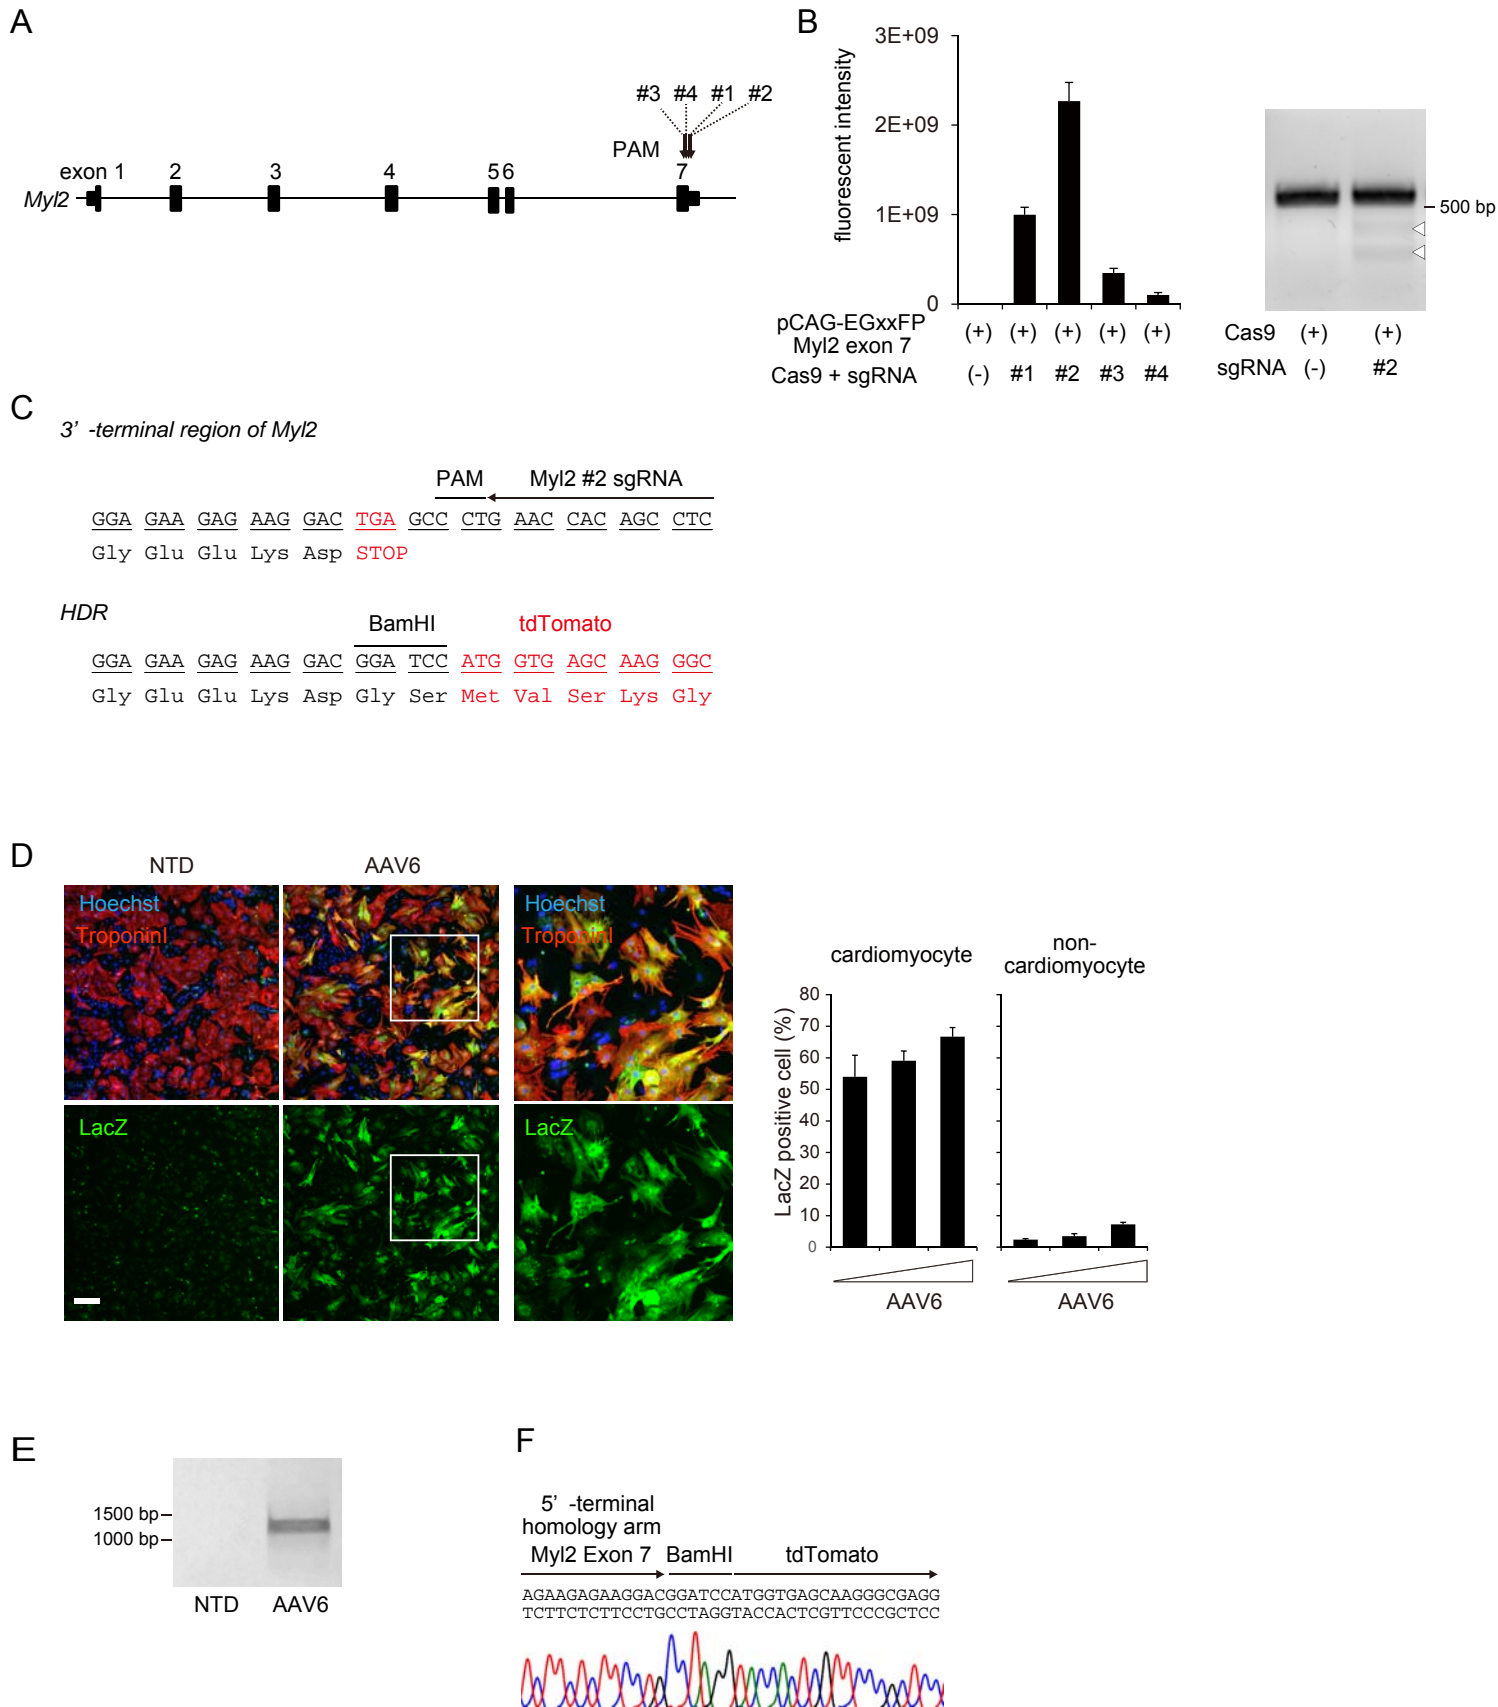





A

Cardiomyocytes from Cas9 knock-in mice

segmented cardiomyocyte

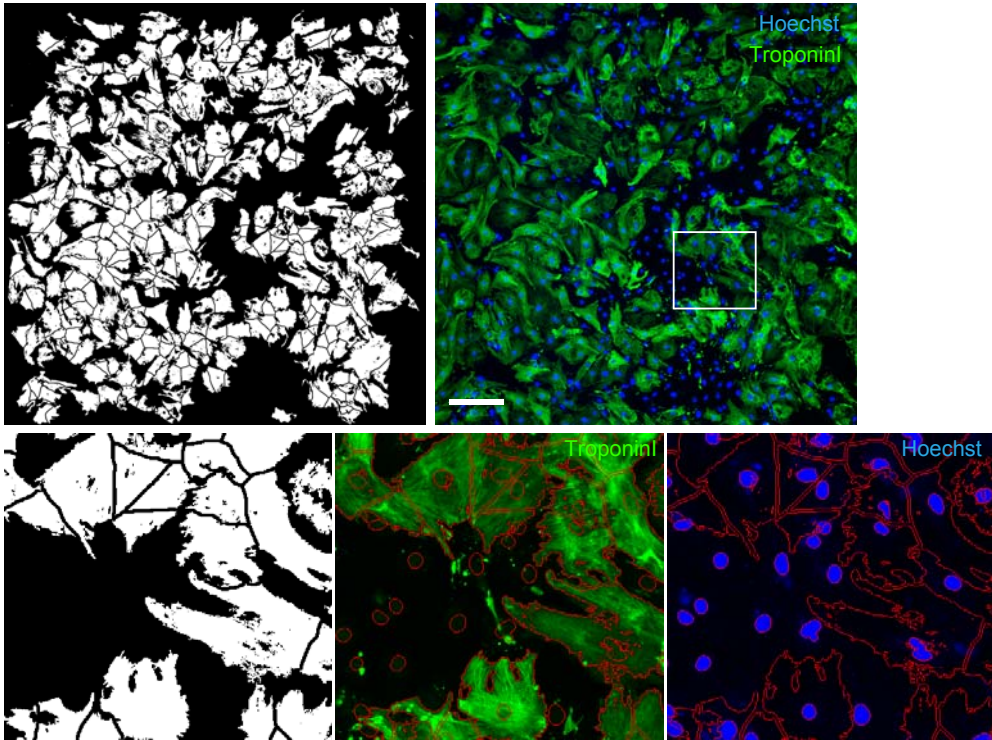

B

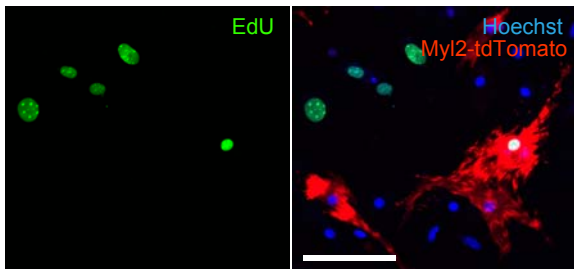

A

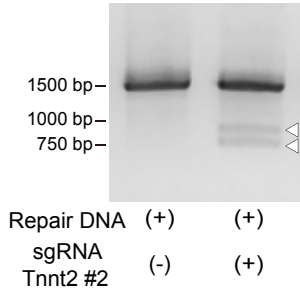

B

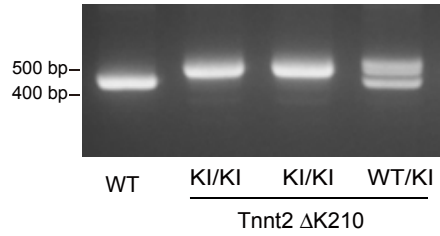

C

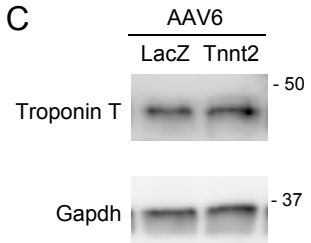

D

|              |                                                                                                      |        |       |
|--------------|------------------------------------------------------------------------------------------------------|--------|-------|
|              | XhoI                                                                                                 | Exon13 | ΔK210 |
| Wildtype     | GGAGGAACCATCTCTAGCCAAGTGTCCCTGCTCACCATCCCCTTCAGACAGAGCGGAAGAGTGGGAAGAGACAGACAGAGAGAGAGAAGAAGAAGAGAT  |        |       |
| ΔK210        | GGAGGAACCATCTCTAGCCAAGTGTCCCTGCTCACCATCCCCTTCAGACAGAGCGGAAGAGTGGGAAGAGACAGACAGAGAGAGAGAAGAAGAAG---AT |        |       |
| HDR template | GGAGGAACCATCTCGAGCCAAGTGTCCCTGCTCACCATCCCCTTCAGACAGAGCGGAAGAGTGGGAAGAGACAGACAGAGAGAGAGAAGAAGAAGAGAT  |        |       |

---

|                |                                                                                                      |  |  |
|----------------|------------------------------------------------------------------------------------------------------|--|--|
| Intact         | GGAGGAACCATCTCTAGCCAAGTGTCCCTGCTCACCATCCCCTTCAGACAGAGCGGAAGAGTGGGAAGAGACAGACAGAGAGAGAGAAGAAGAAG---AT |  |  |
| NHEJ           | GGAGGAACCATCTCTAGCCAAGTGTCCCTGCTCACCATCCCCTTCAGACAGAGCGGAAGAGTGGGAAGAGACAGACAGAGAGAGAGAAGAAGAAG---AT |  |  |
| NHEJ to Exon13 | GGAGGAACCATCTCTAGCCAAGTGTCCCTGCTCACCATCCCCTTCAGACAGAGCGGAAGAGTGGGAAGAGACAGACAGAGAGAGAGAAGAAGAAG---AT |  |  |
| HDR(PAM)       | GGAGGAACCATCTCTAGCCAAGTGTCCCTGCTCACCATCCCCTTCAGACAGAGCGGAAGAGTGGGAAGAGACAGACAGAGAGAGAGAAGAAGAAG---AT |  |  |
| HDR(ΔK210)     | GGAGGAACCATCTCTAGCCAAGTGTCCCTGCTCACCATCCCCTTCAGACAGAGCGGAAGAGTGGGAAGAGACAGACAGAGAGAGAGAAGAAGAAGAGAT  |  |  |
| HDR(XhoI)      | GGAGGAACCATCTCGAGCCAAGTGTCCCTGCTCACCATCCCCTTCAGACAGAGCGGAAGAGTGGGAAGAGACAGACAGAGAGAGAGAAGAAGAAGAGAT  |  |  |

---

|              |                                                                                                     |       |     |
|--------------|-----------------------------------------------------------------------------------------------------|-------|-----|
|              | Exon13                                                                                              | sgRNA | PAM |
| Wildtype     | CCTGGCAGAGAGGAGGAAGGCGCTGGCCATCGACCACCTGAATGAAGACCAACTGAGGTGGGGACAGTTGGTTGGGTGGCCCCTGGCACTCTTCTGAGT |       |     |
| ΔK210        | CCTGGCAGAGAGGAGGAAGGCGCTGGCCATCGACCACCTGAATGAAGACCAACTGAGGTGGGGACAGTTGGTTGGGTGGCCCCTGGCACTCTTCTGAGT |       |     |
| HDR template | CCTGGCAGAGAGGAGGAAGGCGCTGGCCATCGACCACCTGAATGAAGACCAACTGAGGTGGGGACAGTTGGTTGGGTGGCCCCAAACACTCTTCTGAGT |       |     |

---

|                |                                                                                                     |  |  |
|----------------|-----------------------------------------------------------------------------------------------------|--|--|
| Intact         | CCTGGCAGAGAGGAGGAAGGCGCTGGCCATCGACCACCTGAATGAAGACCAACTGAGGTGGGGACAGTTGGTTGGGTGGCCCCTGGCACTCTTCTGAGT |  |  |
| NHEJ           | CCTGGCAGAGAGGAGGAAGGCGCTGGCCATCGACCACCTGAATGAAGACCAACTGAGGTGGGGACAGTTGGTT-----CCCTGGCACTCTTCTGAGT   |  |  |
| NHEJ to Exon13 | CCTGGCAGAGAGGAGGAAGGCGCTGGCCATCGACCAC-----<112bp>-----                                              |  |  |
| HDR(PAM)       | CCTGGCAGAGAGGAGGAAGGCGCTGGCCATCGACCACCTGAATGAAGACCAACTGAGGTGGGGACAGTTGGTTGGGTGGCCCCAAACACTCTTCTGAGT |  |  |
| HDR(ΔK210)     | CCTGGCAGAGAGGAGGAAGGCGCTGGCCATCGACCACCTGAATGAAGACCAACTGAGGTGGGGACAGTTGGTTGGGTGGCCCCAAACACTCTTCTGAGT |  |  |
| HDR(XhoI)      | CCTGGCAGAGAGGAGGAAGGCGCTGGCCATCGACCACCTGAATGAAGACCAACTGAGGTGGGGACAGTTGGTTGGGTGGCCCCAAACACTCTTCTGAGT |  |  |

|                   | heart #1 |       | heart #2 |       | heart #3 |       | heart #4 |       |
|-------------------|----------|-------|----------|-------|----------|-------|----------|-------|
| Intact            | 23       | (46%) | 13       | (26%) | 31       | (62%) | 13       | (26%) |
| NHEJ              | 17       | (34%) | 23       | (46%) | 10       | (20%) | 28       | (56%) |
| NHEJ to Exon13    | 1        | (2%)  | 1        | (2%)  | 2        | (4%)  | 3        | (6%)  |
| HDR(PAM)          | 2        | (4%)  | 3        | (6%)  | 1        | (2%)  | 4        | (8%)  |
| HDR(ΔK210 + XhoI) | 7        | (14%) | 10       | (20%) | 6        | (12%) | 2        | (4%)  |
| total clone       | 50       |       | 50       |       | 50       |       | 50       |       |
